# Supplementary material for: Selectively enhanced Raman/fluorescence spectra in photonic–plasmonic hybrid structures
Source: Royal Society of Chemistry journal article supplement (doi:10.1039/d0na00625d), 2020-01-01
Supplement: d0na00625d1.pdf [file d0na00625d1.pdf]

## Electronic supplementary information

# Selectively enhanced Raman/fluorescence spectrum in photonic-plasmonic hybrid structures

Jisong Qian,<sup>a</sup> Zebing Zhu,<sup>a</sup> Jing Yuan,<sup>a</sup> Ying Liu,<sup>a</sup> Bing Liu,<sup>b</sup> Xiangwei Zhao,<sup>b</sup> and Liyong Jiang<sup>\*a</sup>

*<sup>a</sup>Institute of Micro-nano Photonic & Beam Steering, School of Science, Nanjing University of Science and Technology, Nanjing 210094, China*

*<sup>b</sup>State Key Laboratory of Bioelectromocs, School of biological Science and Medical Engineering, Southeast University, Nanjing 210009, China*

*\*Corresponding author: [jly@njust.edu.cn](mailto:jly@njust.edu.cn)*

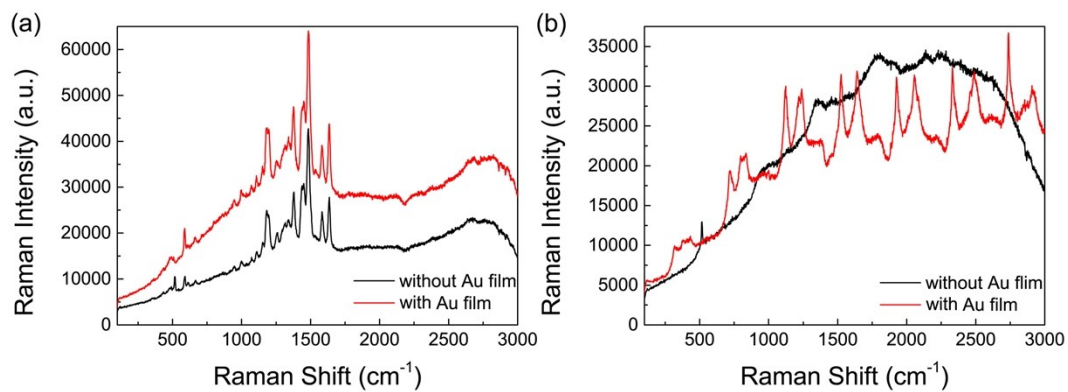

**Fig. S1** Raman spectra of (a) NBA/Au NPs/PS MS and (b) PS MS/NBA/Au NPs on the pure SiO<sub>2</sub>/Si substrate without Au film (black) and with 100 nm Au film (red).

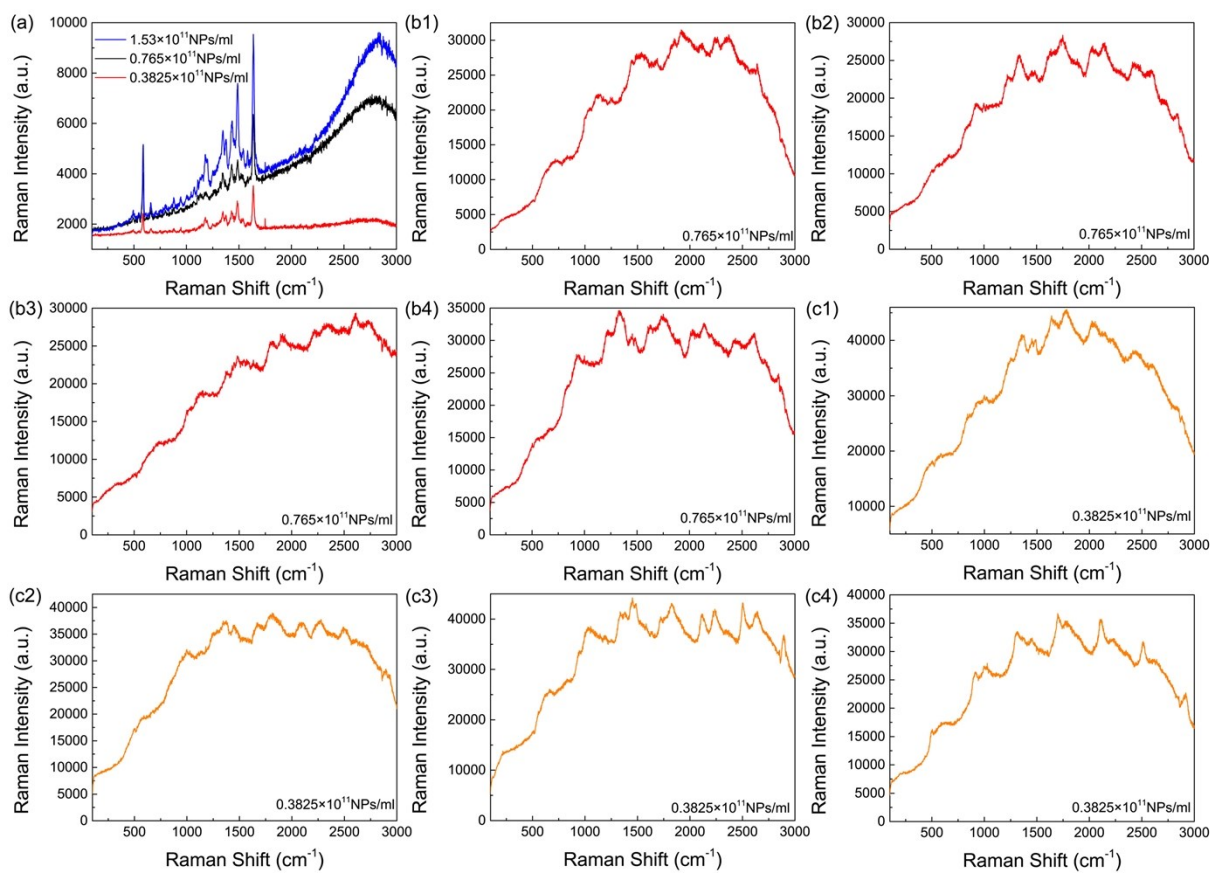

**Fig. S2** (a) Raman spectra of NBA on Au NPs with different concentrations of Au NPs. (b1)-(b4) Raman spectra of NBA on Au NPs/PS MS with the Au NPs concentrations at  $0.765 \times 10^{11}$  NPs/ml. (c1)-(c4) Raman spectra of NBA on Au NPs/PS MS with the Au NPs concentrations at  $0.3825 \times 10^{11}$  NPs/ml. For the case of NBA on Au NPs, the Raman signal of NBA almost linearly decreases with the concentration of Au NPs. As a comparison, for the case of NBA on Au NPs/PS MS, even when the concentration of Au NPs is decreased down to half of the original value, the hybrid structure no longer work for the selectively enhancement of NBA's Raman signal.

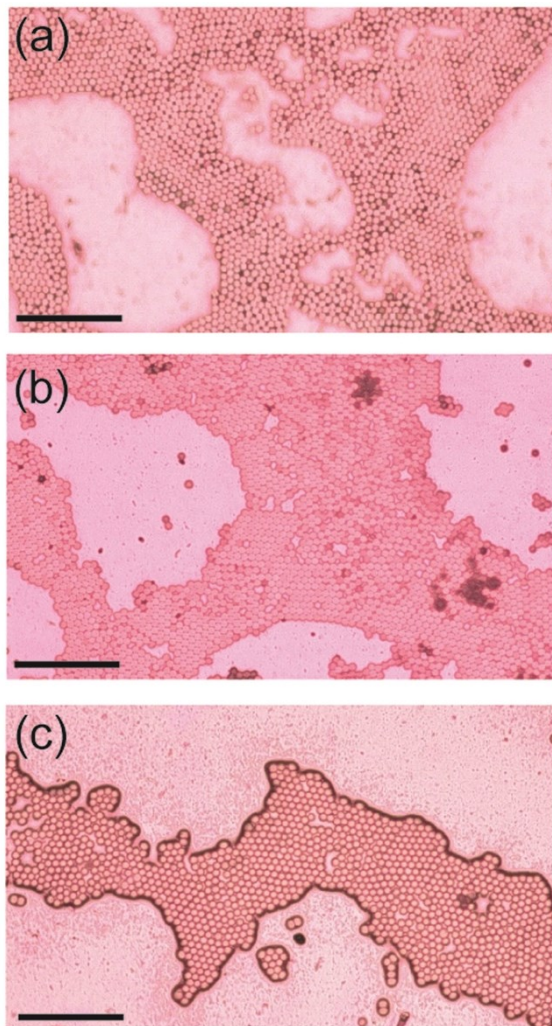

**Fig. S3** Microscopical images of (a) PS MS/NBA/Au NPs, (b) Au NPs/PS MS/NBA, and (c) NBA/Au NPs/PS MS. The scale bar in each sub figure is 10 μm.
